# Supplementary material for: SNAr reaction in aqueous medium in the presence of mixed organic and inorganic bases
Source: Royal Society of Chemistry journal article supplement (doi:10.1039/c5ra03510d), 2015-01-01
Supplement: c5ra03510d1.pdf [file c5ra03510d1.pdf]

## Supporting information

### **S<sub>N</sub>Ar reaction in aqueous medium in presence of mixed organic and inorganic bases**

**Nilesh B Shelke,<sup>a</sup> RamaRao Ghorpade,<sup>a</sup> Ajay Pratap,<sup>a</sup> Vijay Tak,<sup>b</sup> B.N. Acharya<sup>a\*</sup>**

<sup>a</sup>Process Technology Development Division, <sup>b</sup>Vertex Laboratory, Defence R & D Establishment, Jhansi Road, Gwalior-474002 (MP) India  
E-mail: bnacharya@drde.drdo.in

### Contents

|                                  |              |
|----------------------------------|--------------|
| <b>1. General procedure</b>      | <b>1</b>     |
| <b>2. ESI-MS and NMR Spectra</b> | <b>2-19</b>  |
| <b>3. Molecular modelling</b>    | <b>20-23</b> |

- 1. General procedure for protocol 1: Synthesis of 2,4-diaminoquinazoline:** In a round bottom flask add 3 ml N,N-dimethylacetamide (DMA), 0.001 mole of 2-fluorobenzonitrile, 0.001 mole of guanidine carbonate, 0.001 mole of N,N-diisopropylethylamine (DIPEA) and 0.001 mole of Na<sub>2</sub>CO<sub>3</sub>. Reaction was carried out at 125<sup>0</sup>C in an oil bath. After 3 hours, reaction was stopped by cooling the reaction mixture. The product was precipitated out by adding 1 ml dicloromethane followed by excess hexane on an ice bath. Precipitates were separated, washed with 3 ml water and recrystallized from methanol to achieve the pure product.
- 2. General procedure for protocol 2: Synthesis of 2-piperidinylbenzonitrile:** In a round bottom flask add 3 ml water, 0.001 mole of 2-fluorobenzonitrile, 0.001 mole of piperidine, 0.001 mole of N,N-diisopropylethylamine (DIPEA), 0.0001 mol of tert-butylammoniumbromide (TBAB) and 0.001 mole of Na<sub>2</sub>CO<sub>3</sub>. Reaction was carried out at reflux for 3 hours. Then reaction mixture was cooled and extracted with ethyl acetate. The productes were purified by flash chromatography on silica by using hexane-ethylacetate mobile phase.

**Table S1: Spectroscopic data (Table 3)**

| Compounds            | MS (MH <sup>+</sup> ) |          | NMR                                                                                                                          | Reference |
|----------------------|-----------------------|----------|------------------------------------------------------------------------------------------------------------------------------|-----------|
|                      | Calculated            | Observed |                                                                                                                              |           |
| Table 3<br>(entry a) | 161.0749              | 161.0314 | (DMSO- <i>d</i> <sub>6</sub> , δ): 5.957 (2H, s), 6.995 (1H, m), 7.194 (1H, m), 7.246 (2H, s), 7.465 (1H, m), 7.933 (1H, m). | 12        |
| Table 3<br>(entry b) | 179.0655              | 178.9325 | (MeOD, δ): 6.806 (1H, m), 7.098 (1H, m), 7.499 (1H, m).                                                                      | 12        |
| Table 3<br>(entry c) | 179.0655              | 178.9757 | (DMSO- <i>d</i> <sub>6</sub> , δ): 5.798 (2H, s), 7.054 (1H, m), 7.197 (2H, s), 7.363 (1H, m), 7.820 (1H, m).                |           |
| Table 3<br>(entry d) | 179.0655              | 178.9613 | (DMSO- <i>d</i> <sub>6</sub> , δ): 6.102 (2H, s), 6.684 (2H, m), 7.304 (2H, s), 8.021 (1H, m).                               |           |
| Table 3<br>(entry e) | 197.0561              | 197.1419 | (DMSO- <i>d</i> <sub>6</sub> , δ): 5.911 (4H, s), 6.854 (1H, m), 7.559 (1H, m).                                              |           |
| Table 3<br>(entry f) | 191.0855              | 191.0940 | (CDCl <sub>3</sub> , δ): 3.950 (3H, s), 4.793 (2H, s), 5.611 (2H, s), 6.521 (1H, m), 7.023 (1H, m), 7.451 (1H, m).           | 12        |

Table 3 (entry a)

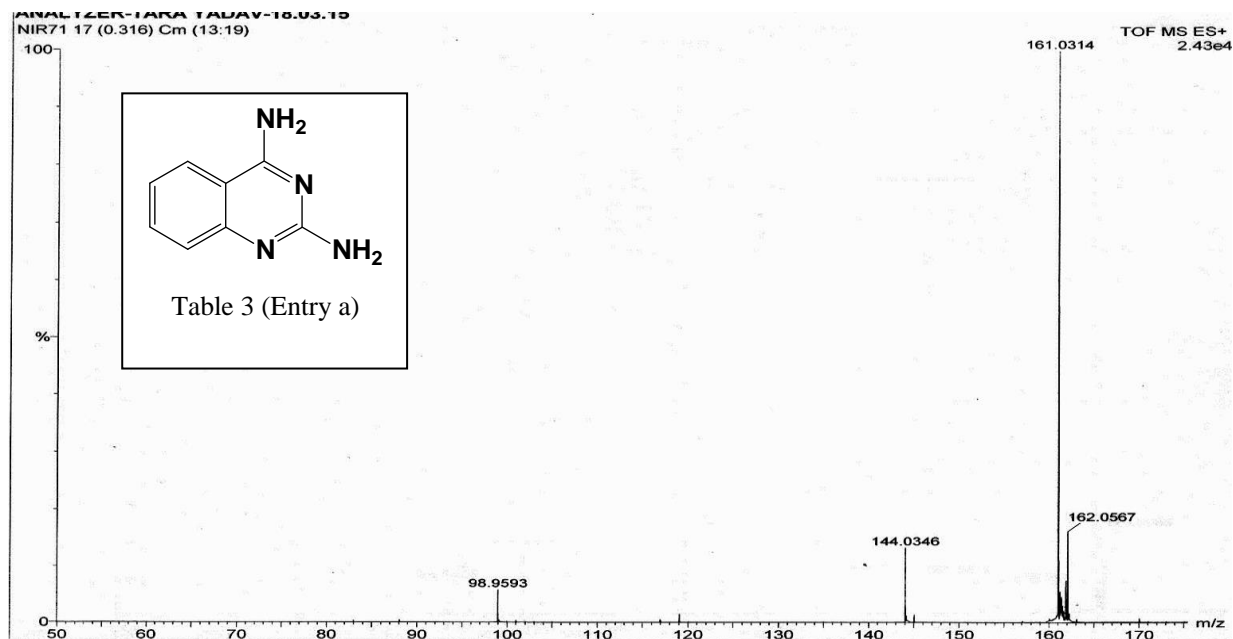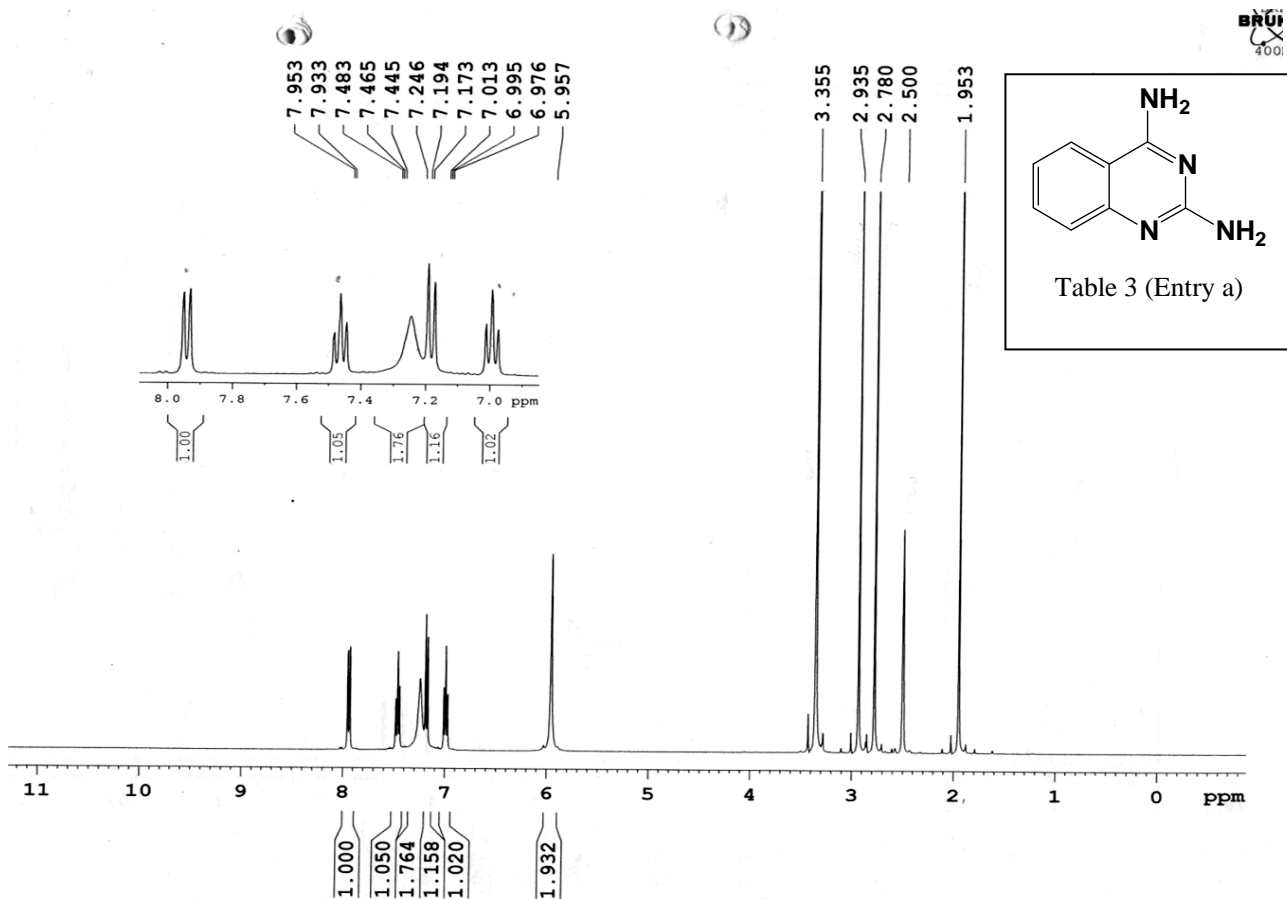

Table 3 (entry b)

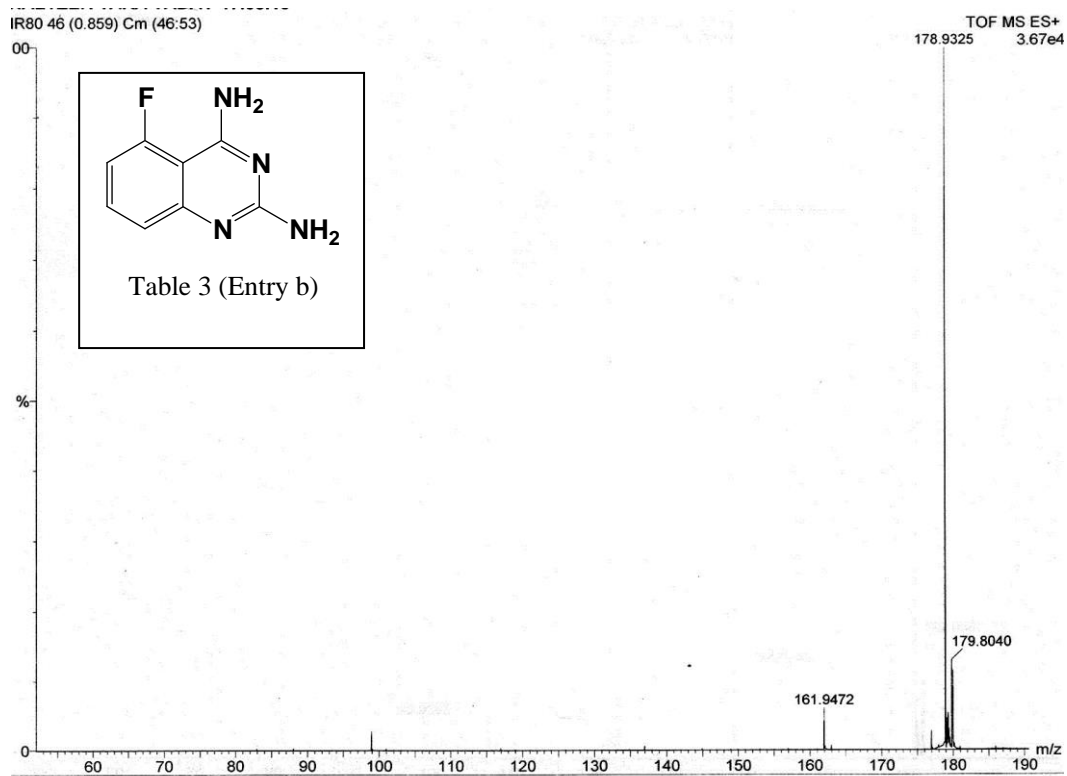

NIR-80

400MHz

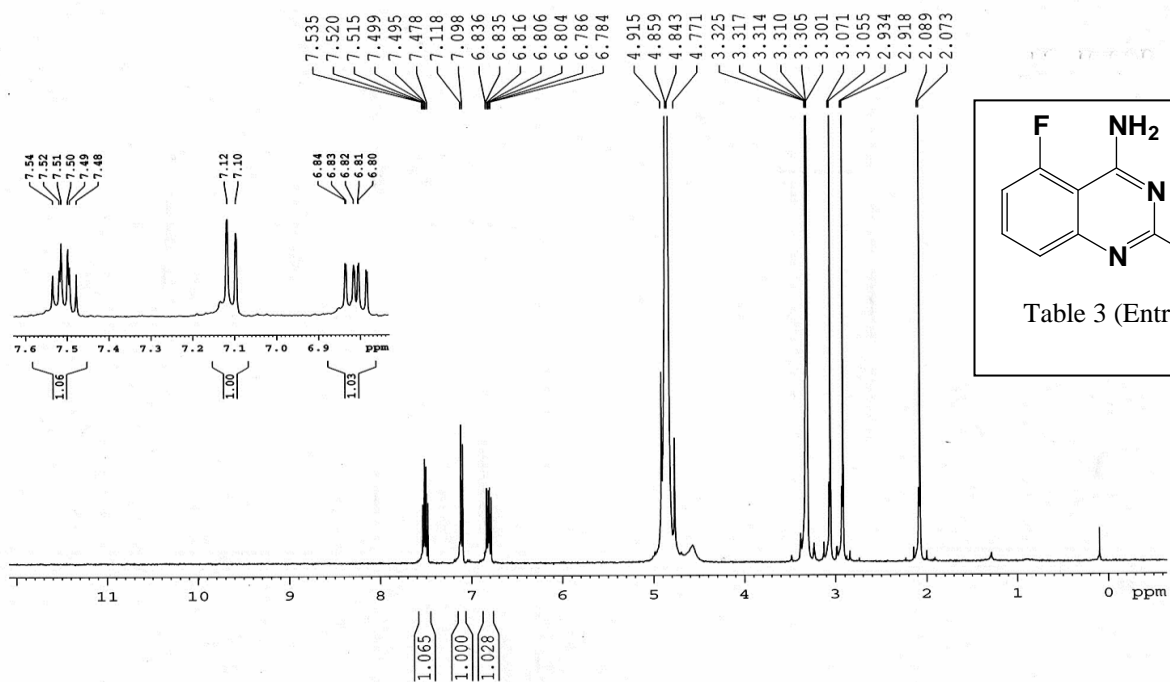

file No.10/626

Table 3 (entry c)

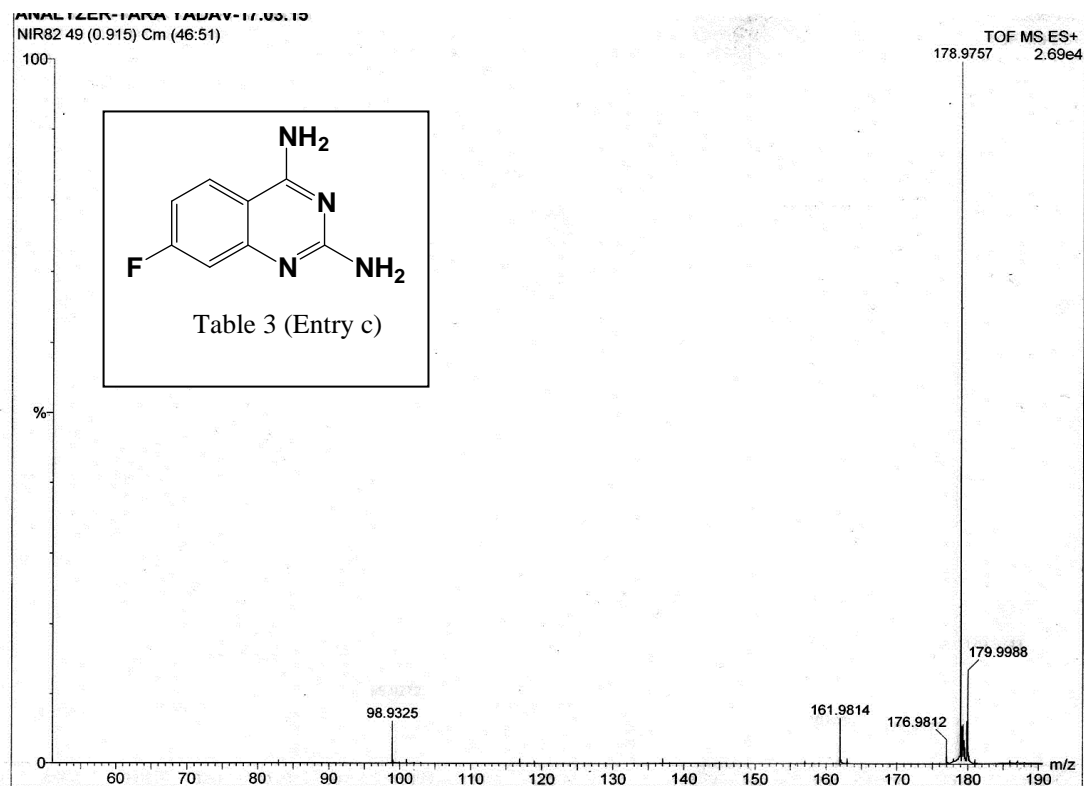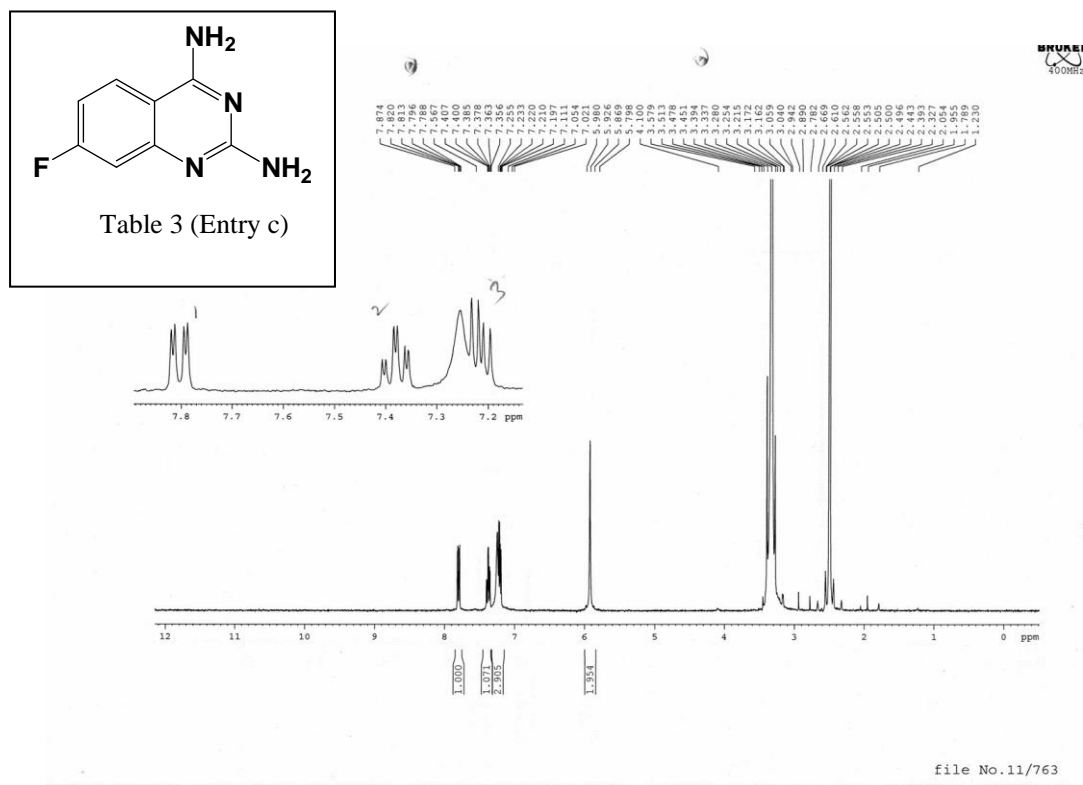

Table 3 (Entry d)

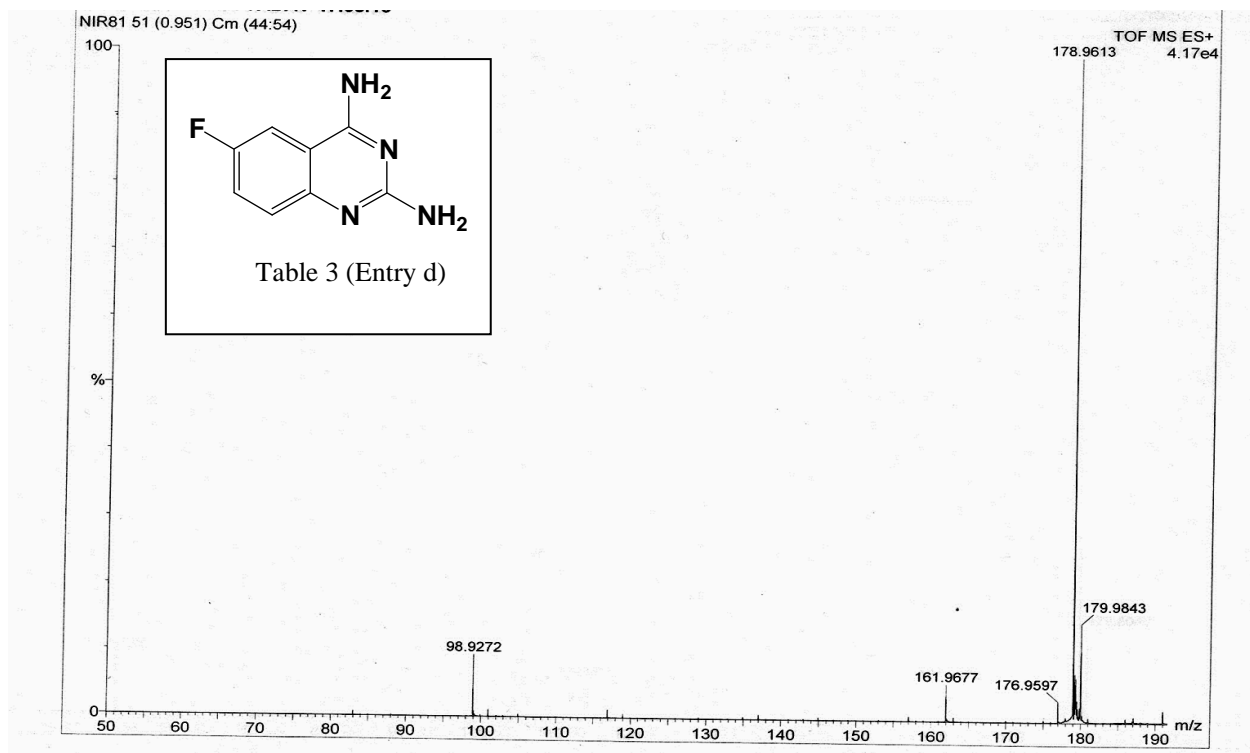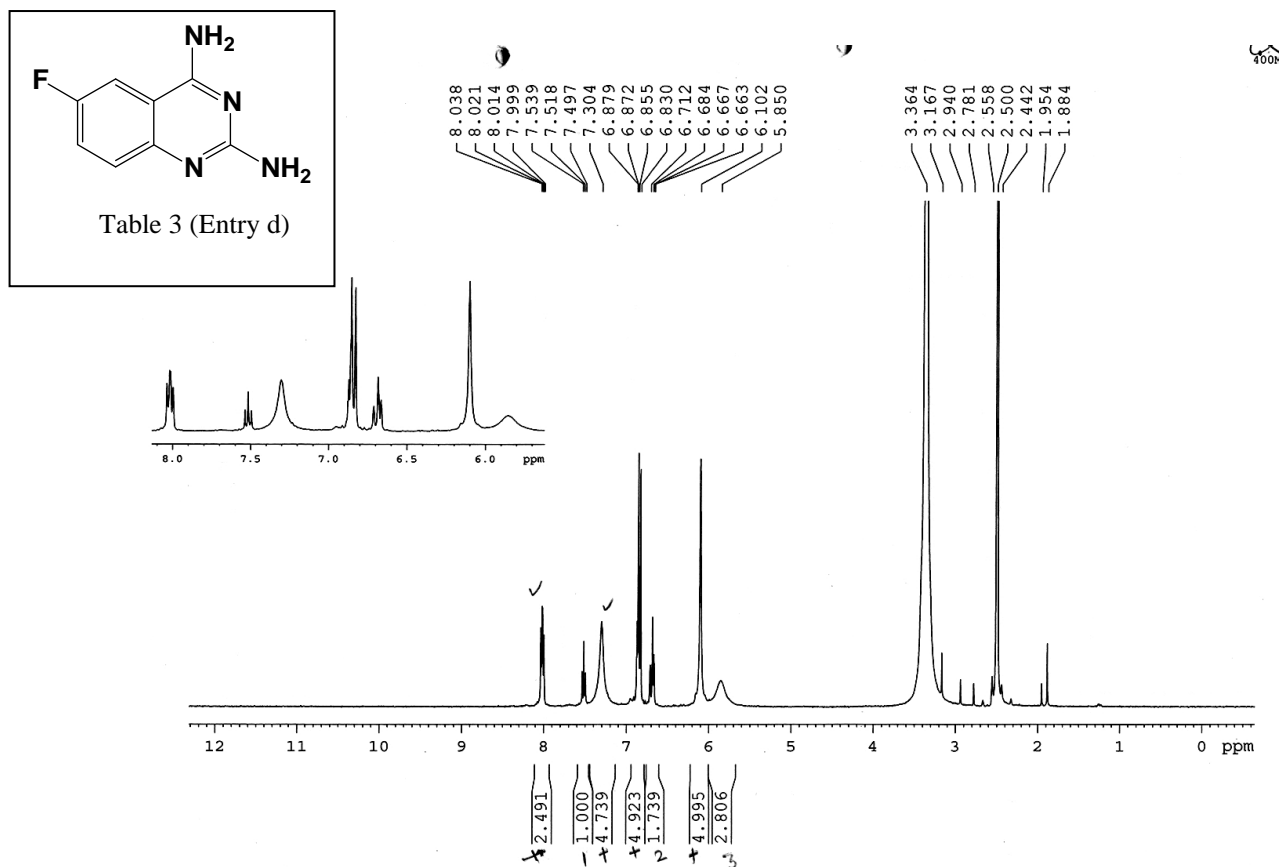

file No.11/762

Table 3(entry e)

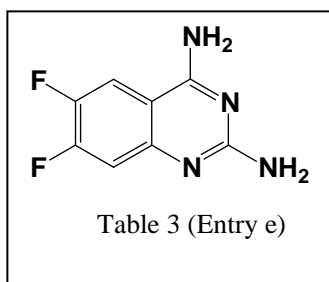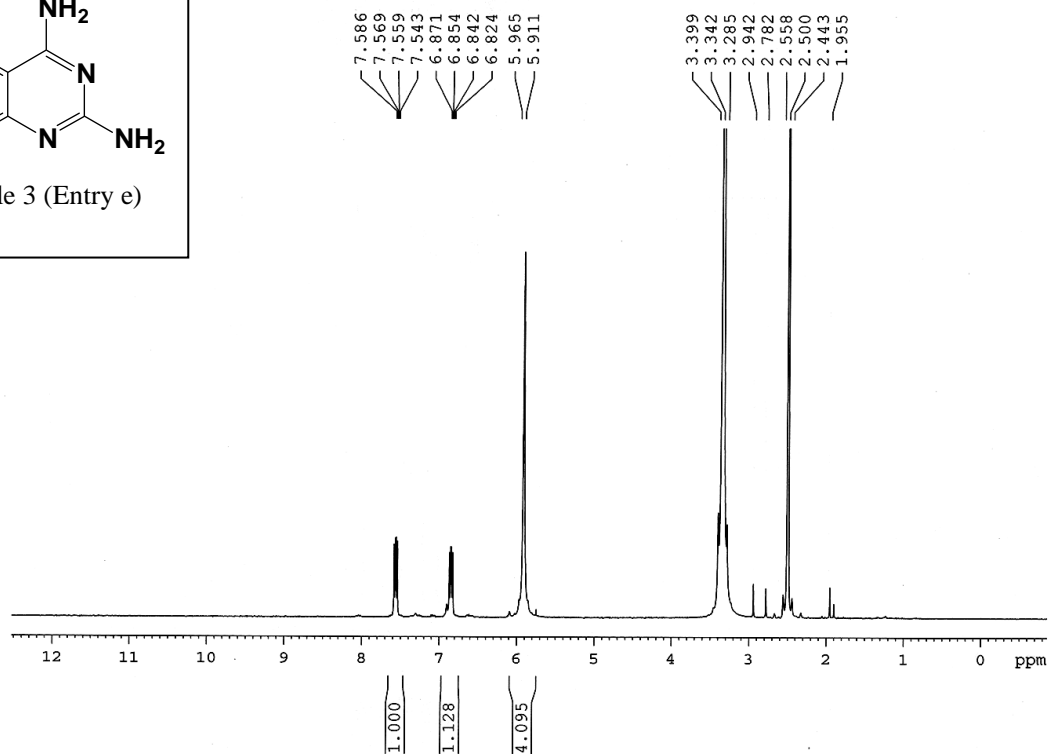

file No.11/764

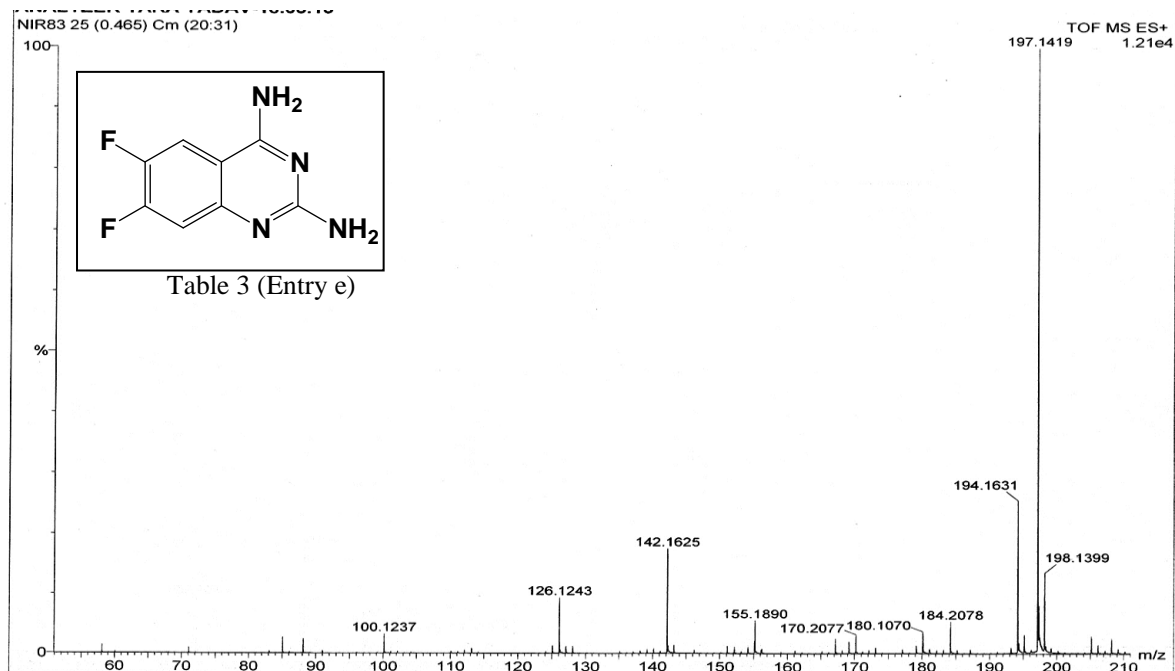

Table 3 (entry f)

User Spectrum

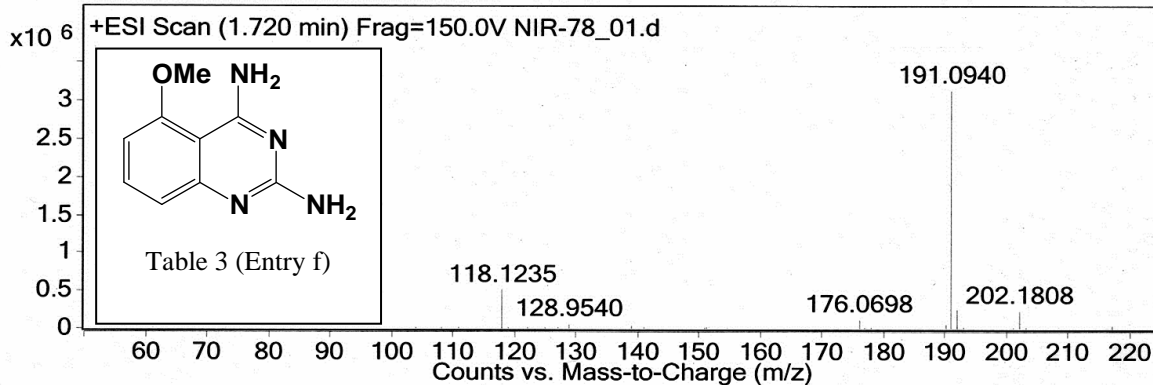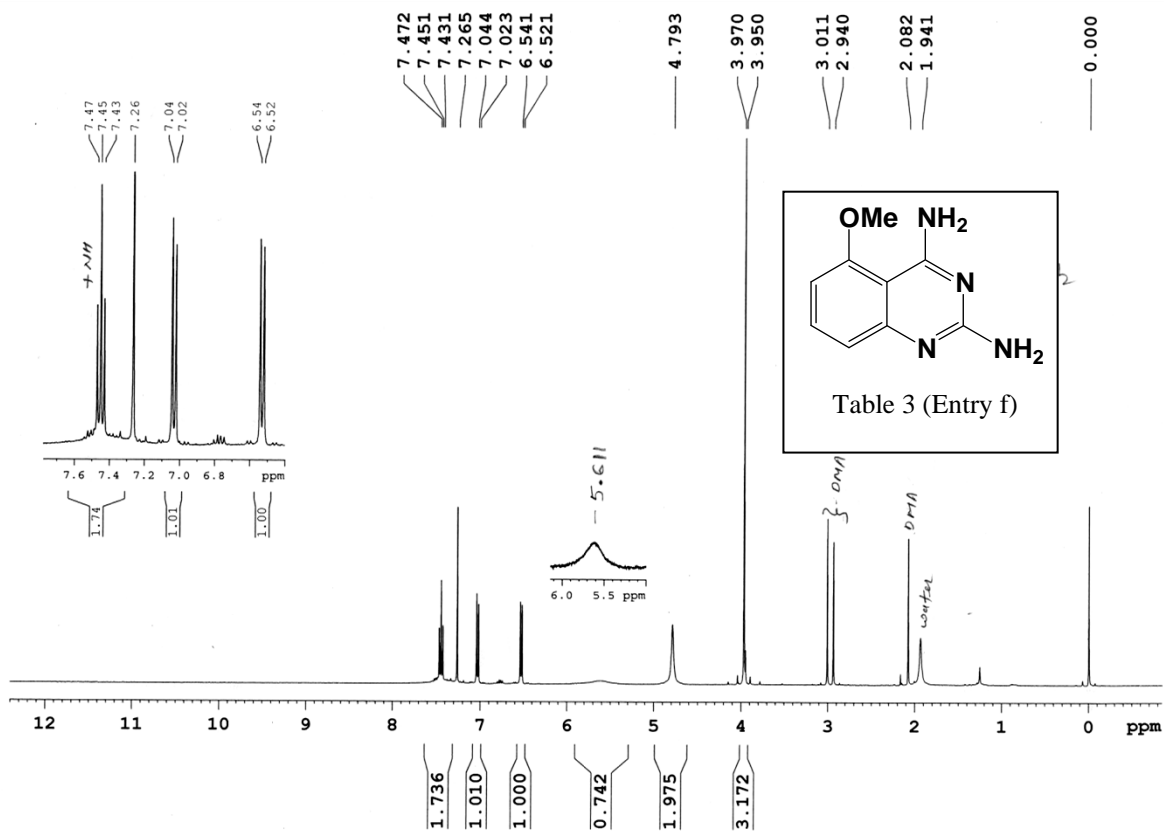

file No.10/624



**Table S2: Spectroscopic data (Table 4)**

| Compounds            | MS (MH <sup>+</sup> ) |          | NMR                                                                                                                               |
|----------------------|-----------------------|----------|-----------------------------------------------------------------------------------------------------------------------------------|
|                      | Calculated            | Observed |                                                                                                                                   |
| Table 4<br>(entry a) | 187.1157              | 187.1159 | (CDCl <sub>3</sub> , δ): 1.601 (2H, m), 1.763 (4H, m), 3.158 (4H, m), 6.977 (2H, m), 7.446 (1H, m), 7.541 (1H, m).                |
| Table 4<br>(entry b) | 205.1063              | 205.1146 | (CDCl <sub>3</sub> , δ): 1.666 (6H, m), 3.345 (4H, m), 6.505 (1H, m), 6.595 (1H, m), 7.352 (1H, m).                               |
| Table 4<br>(entry c) | 205.1063              | 205.1152 | (CDCl <sub>3</sub> , δ): 1.616 (2H, m), 1.751 (4H, m), 3.216 (4H, m), 6.666 (1H, m), 6.718 (1H, m), 7.373 (1H, m).                |
| Table 4<br>(entry d) | 221.0767              | 221.1961 | (CDCl <sub>3</sub> , δ): 1.664 (6H, s), 3.334 (4H, s), 6.717 (1H, m), 6.834 (1H, s), 7.397 (1H, m).                               |
| Table 4<br>(entry e) | 239.1160              | 239.1003 | (CDCl <sub>3</sub> , δ): 1.604 (2H, m), 1.742 (4H, m), 3.159 (4H, m), 3.891 (3H, s), 6.503 (1H, m), 6.572 (1H, m), 7.351 (1H, m). |
| Table 4<br>(entry f) | 252.0906              | 252.0992 | (CDCl <sub>3</sub> , δ): 1.604 (2H, m), 1.742 (4H, m), 3.159 (4H, m), 3.891 (3H, s), 6.503 (1H, m), 6.572 (1H, m), 7.351 (1H, m). |
| Table 4<br>(entry g) | 205.1063              | 205.0961 | (CDCl <sub>3</sub> , δ): 1.755 (6H, m), 3.261 (4H, m), 7.128 (1H, m), 8.201 (1H, m), 8.645 (1H, m).                               |
| Table 4<br>(entry h) | 189.0950              | 189.1897 | (CDCl <sub>3</sub> , δ): 3.210 (4H, m), 3.905 (4H, m), 7.040 (2H, m), 7.490 (1H, m), 7.591 (1H, m).                               |
| Table 4<br>(entry i) | 227.0906              | 227.0937 | (CDCl <sub>3</sub> , δ): 3.210 (4H, m), 3.905 (4H, m), 7.040 (2H, m), 7.490 (1H, m), 7.591 (1H, m).                               |
| Table 4<br>(entry j) | 234.1328              | 234.1206 | (CDCl <sub>3</sub> , δ): 4.434 (2H, m), 5.118 (1H, s), 6.427 (2H, m), 7.308 (6H, m).                                              |

Table 4 (Entry a)

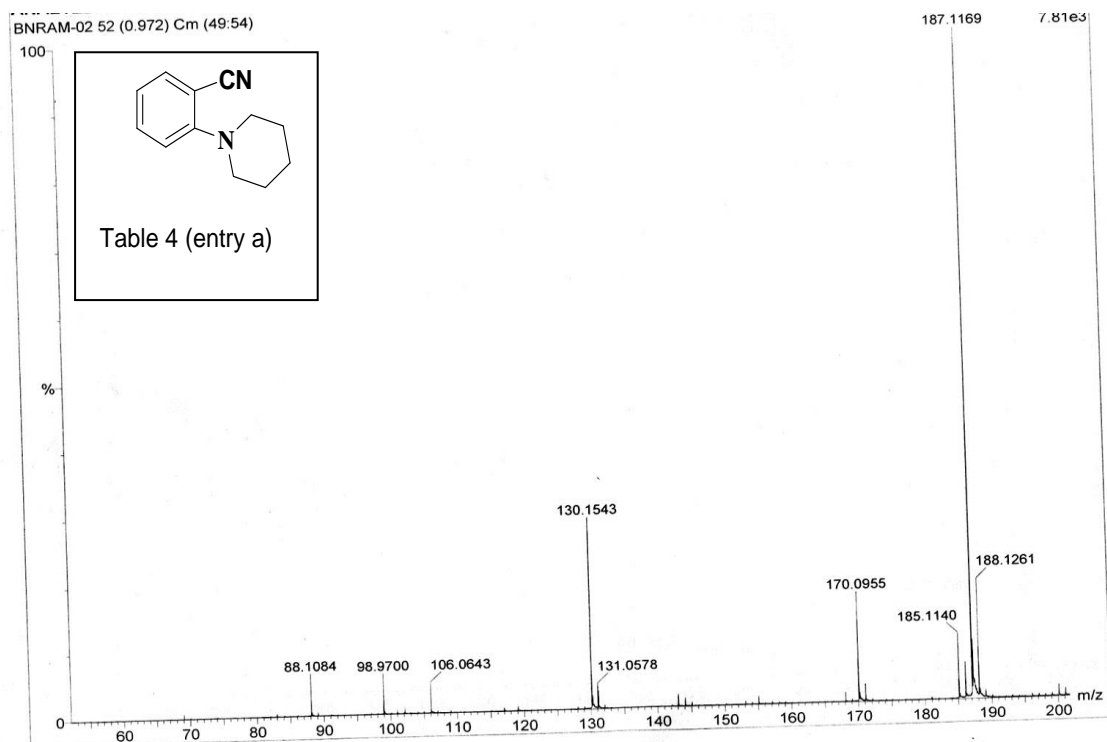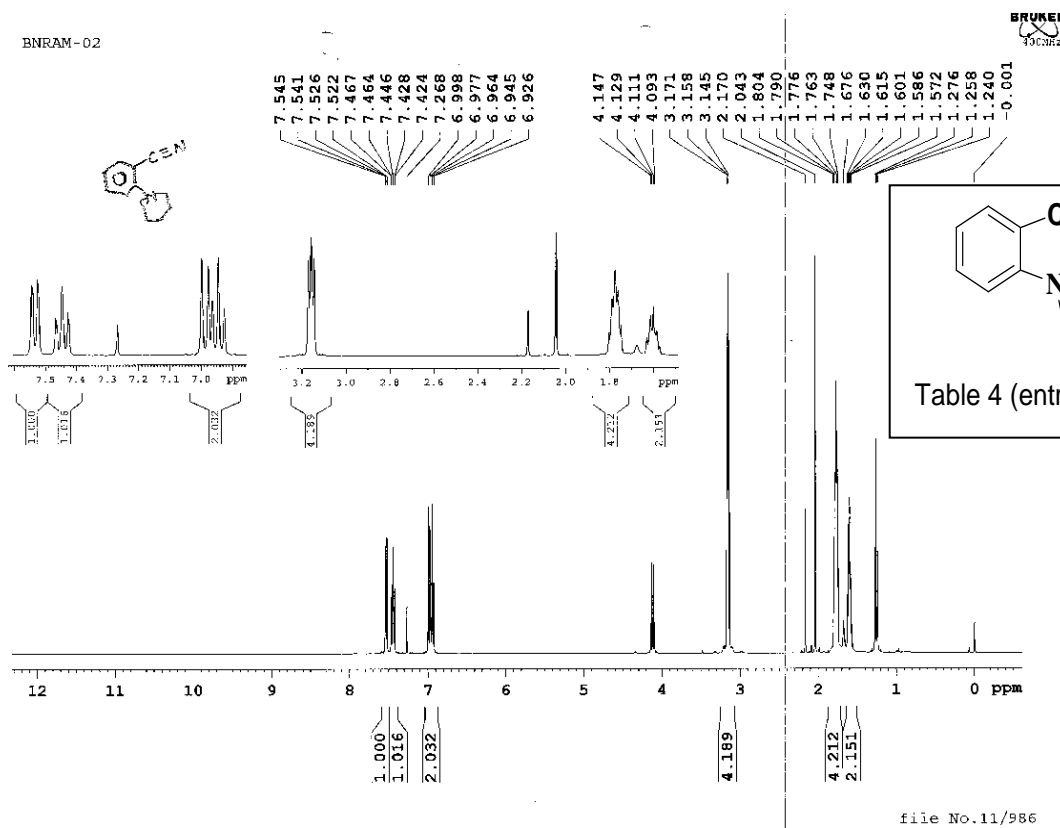

Table 4 (entry b)

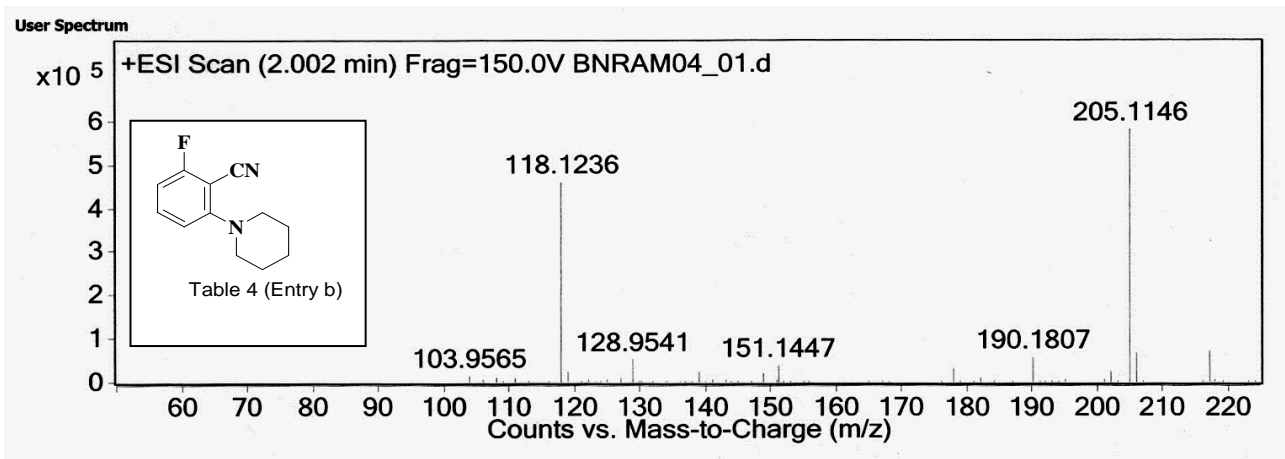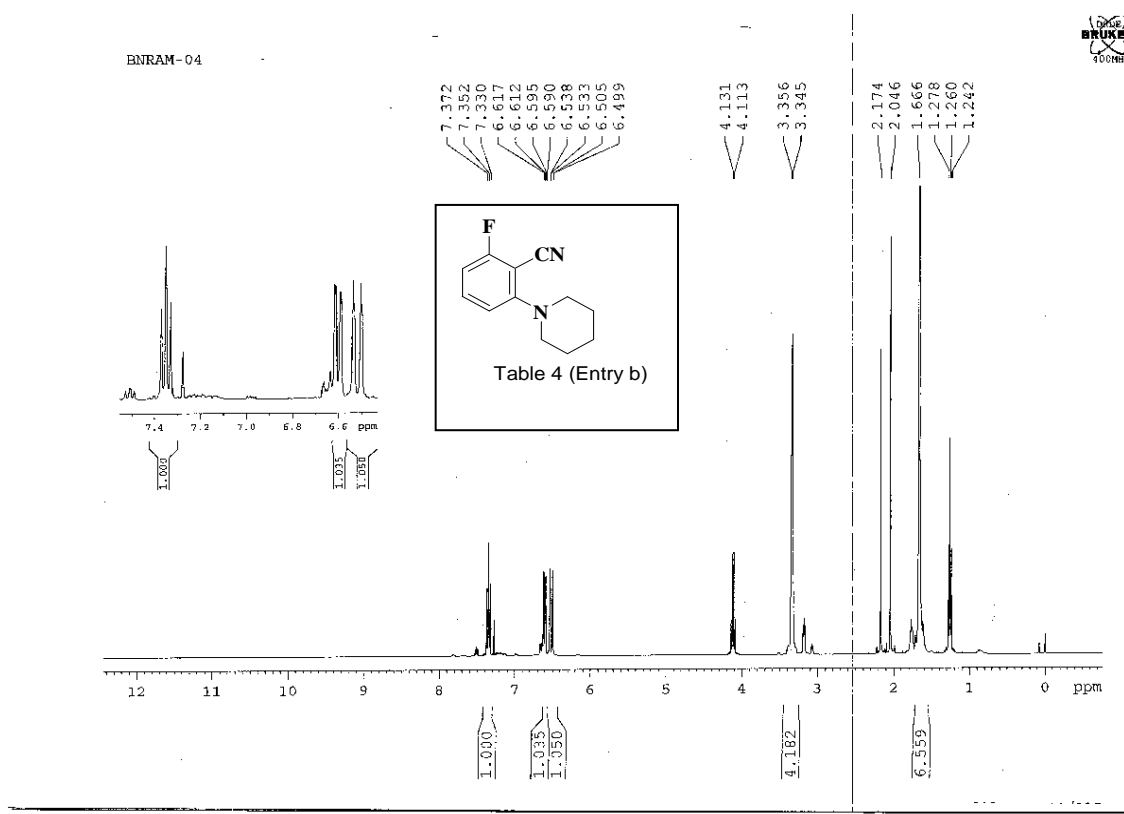

Table 4 (entry c)

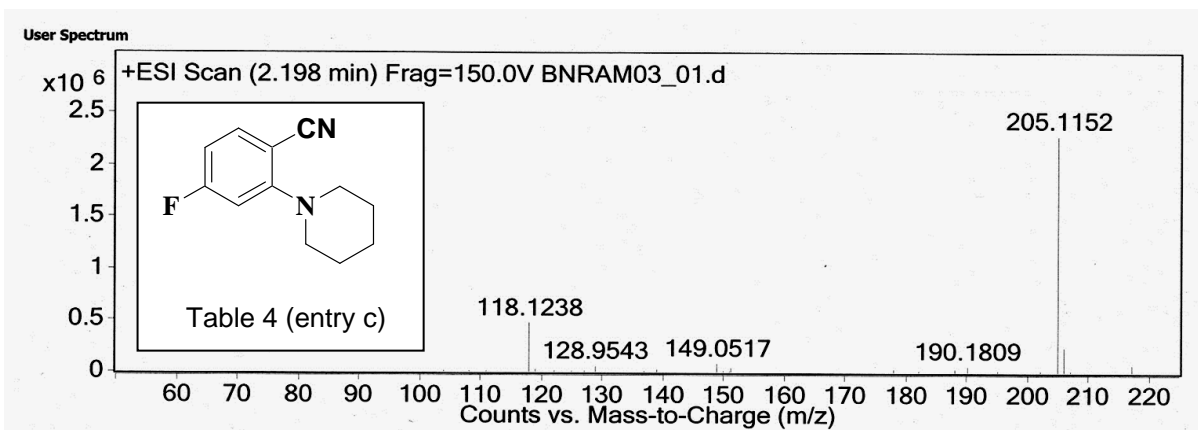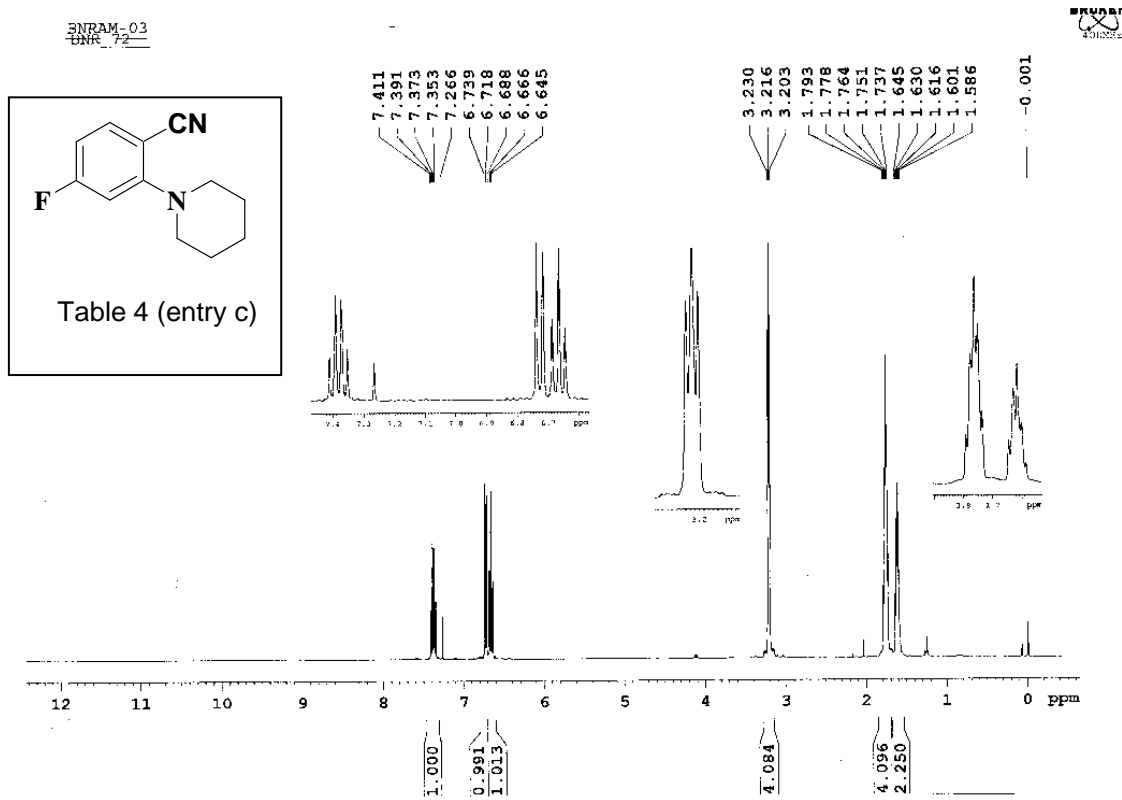

file No.11/929

Table 4 (entry d)

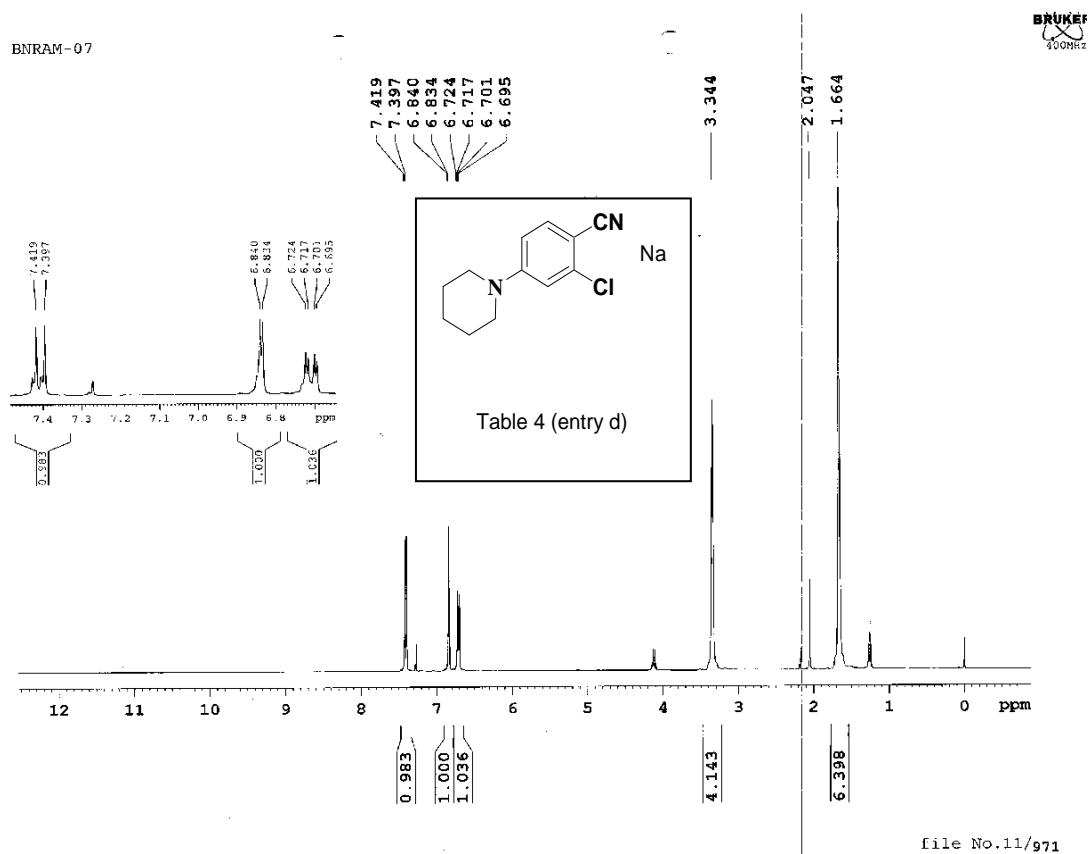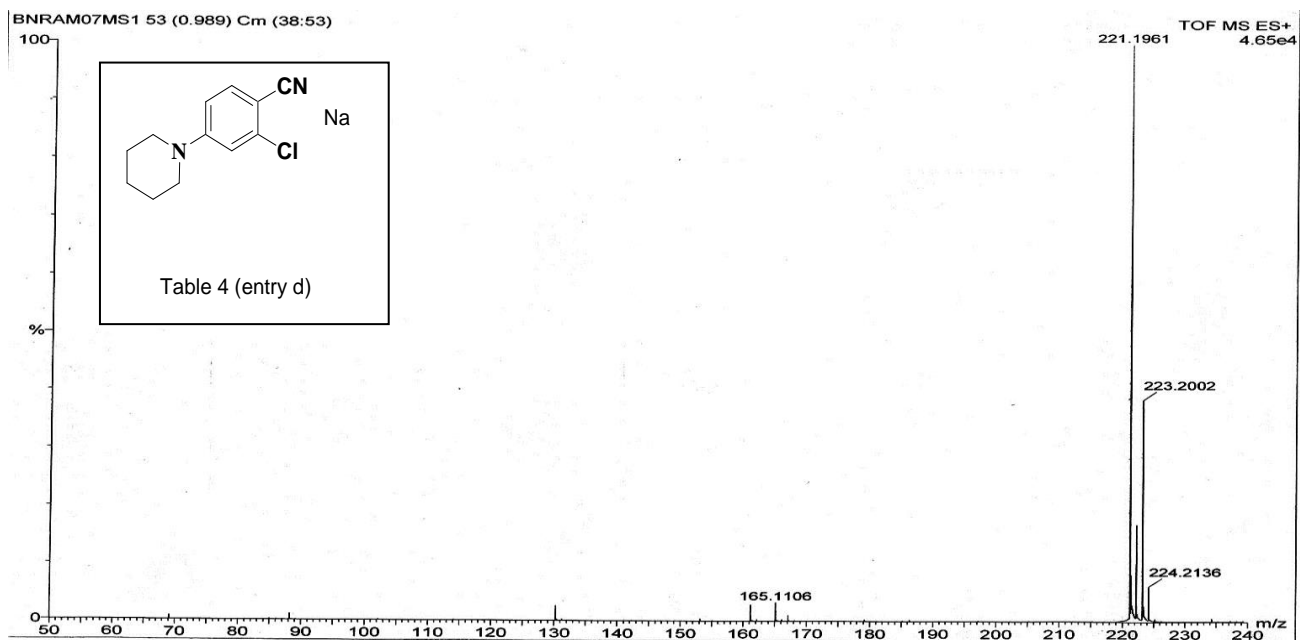

Table 4 (entry e)

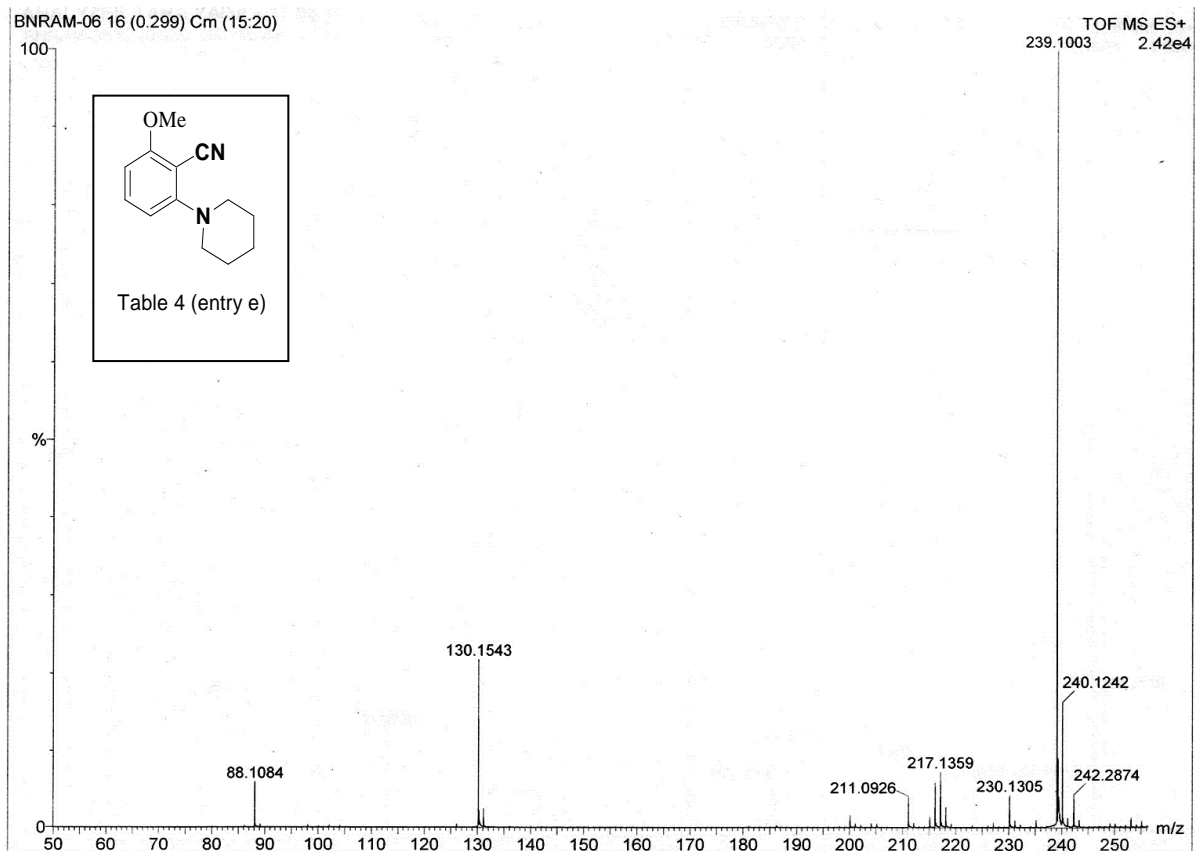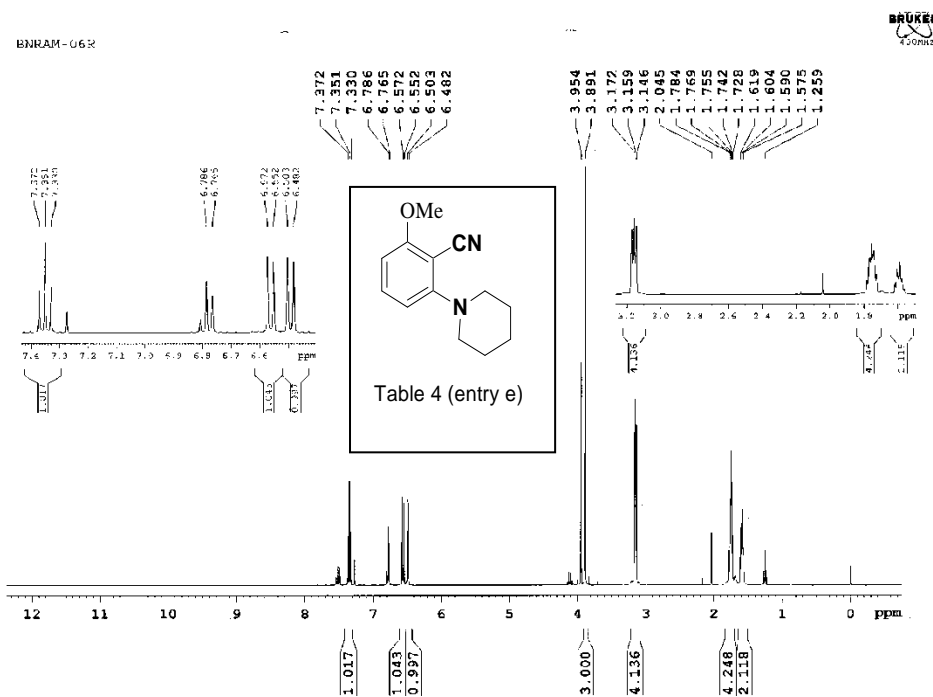

file No.11/953

Table 4 (entry f)

User Spectrum

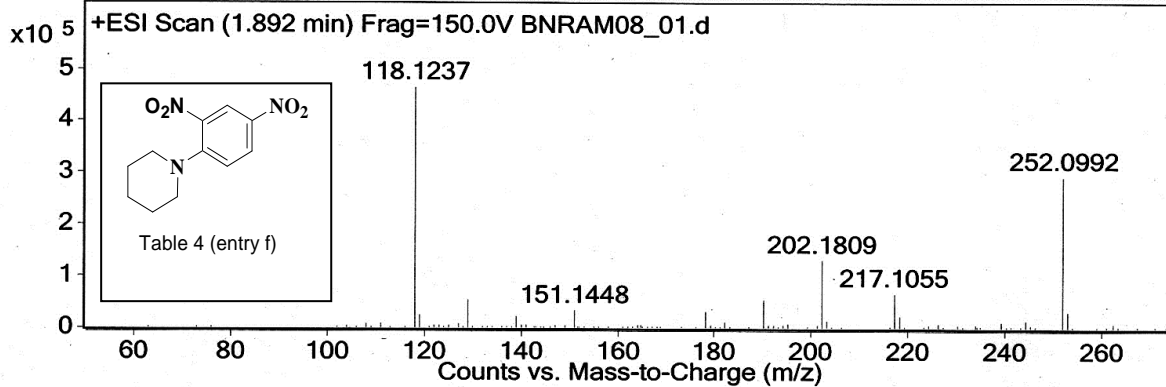

BNRAM-08

BRUKER  
FOUR

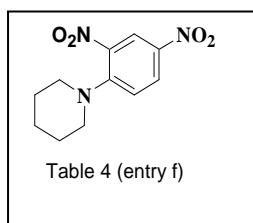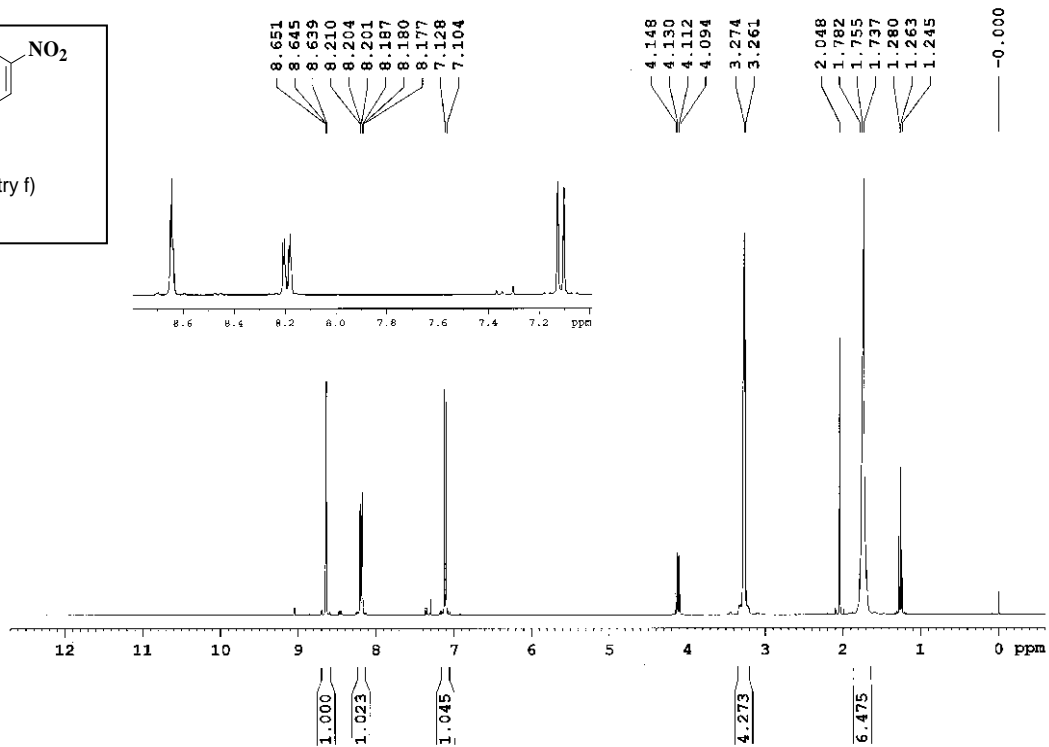

file No.11/988

Table 4 (entry g)

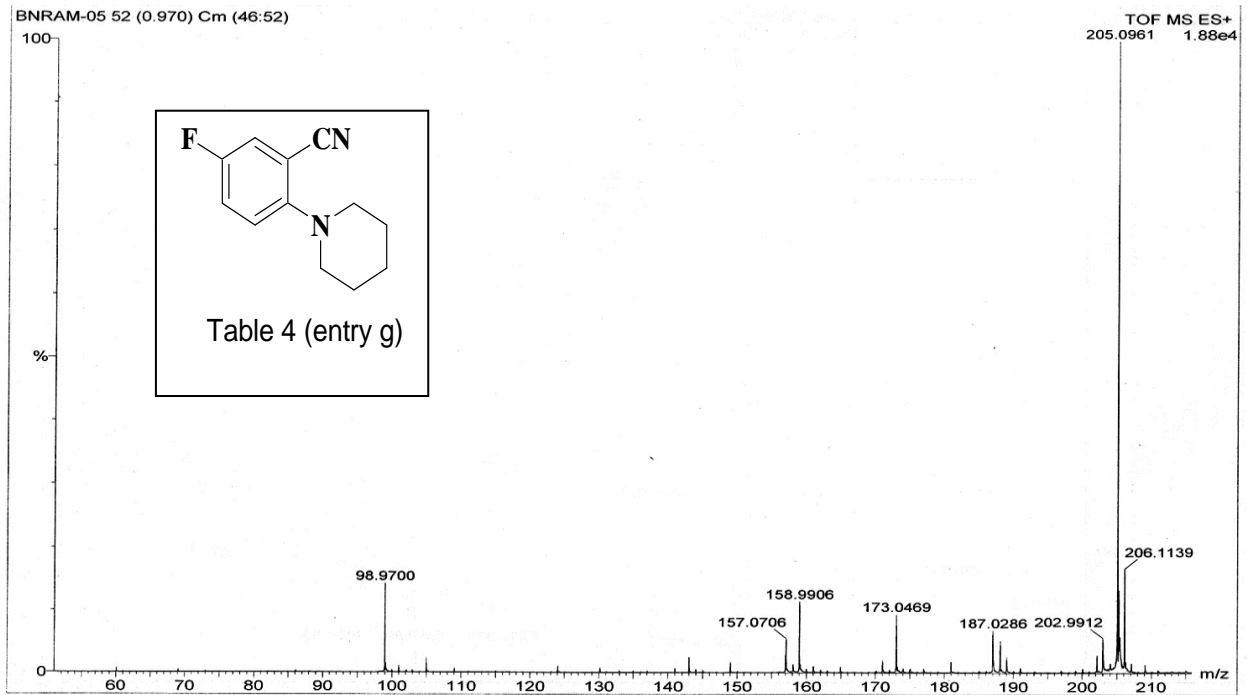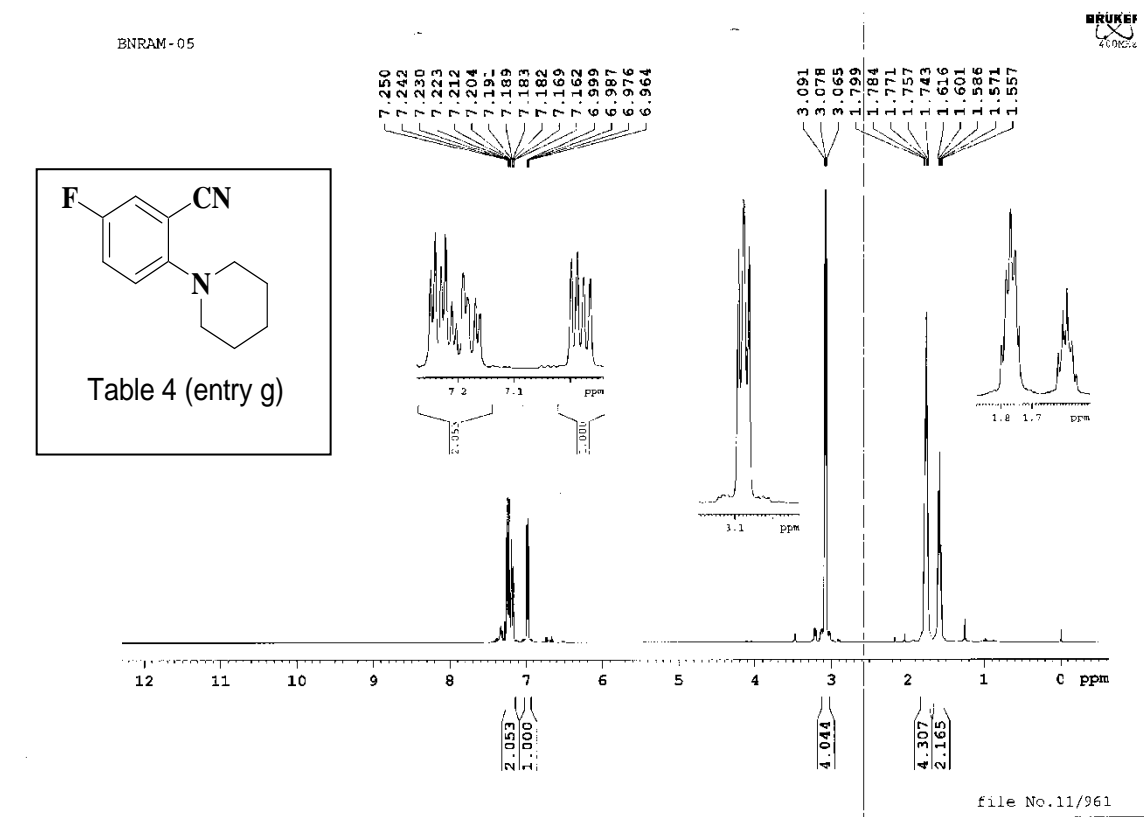



Table 4 (entry h)

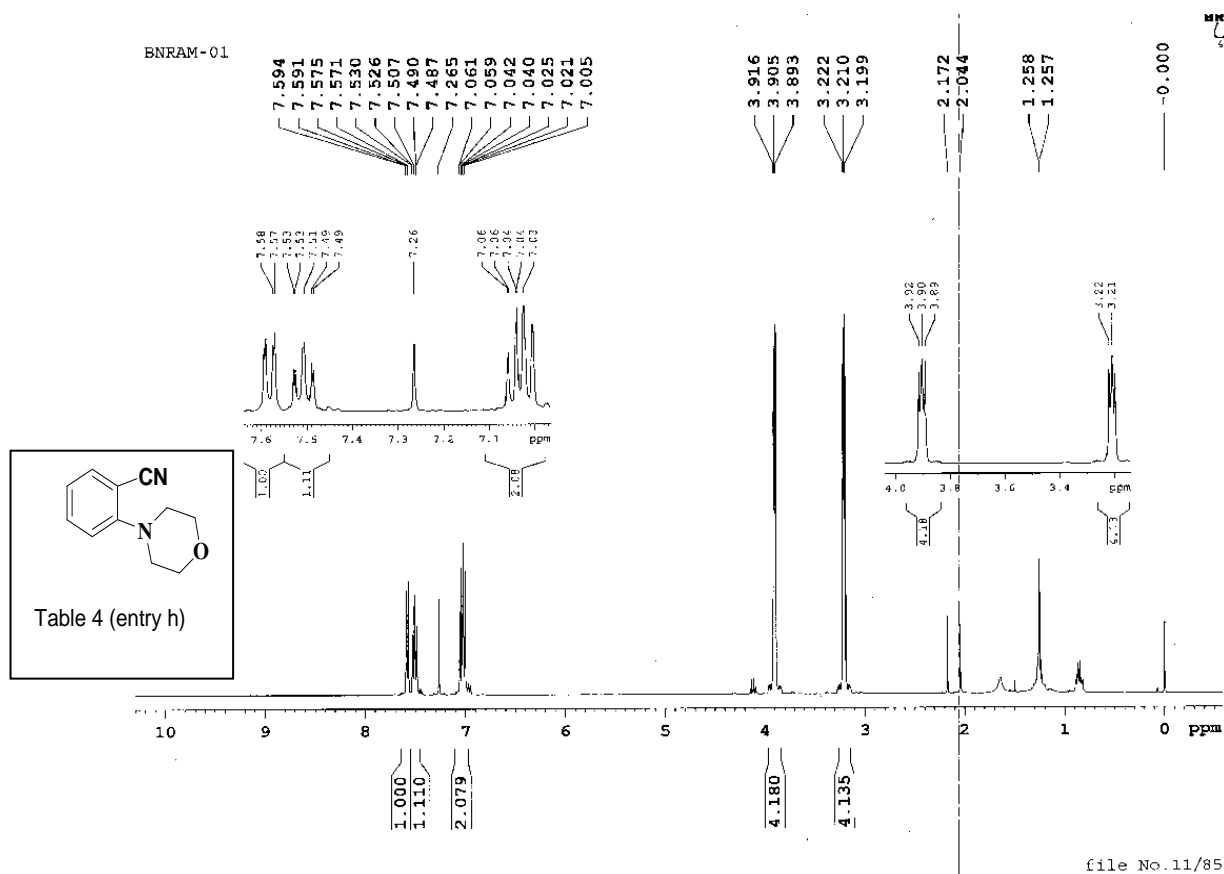

3NRAM01MIX1 14 (0.260) Cm (13:19)

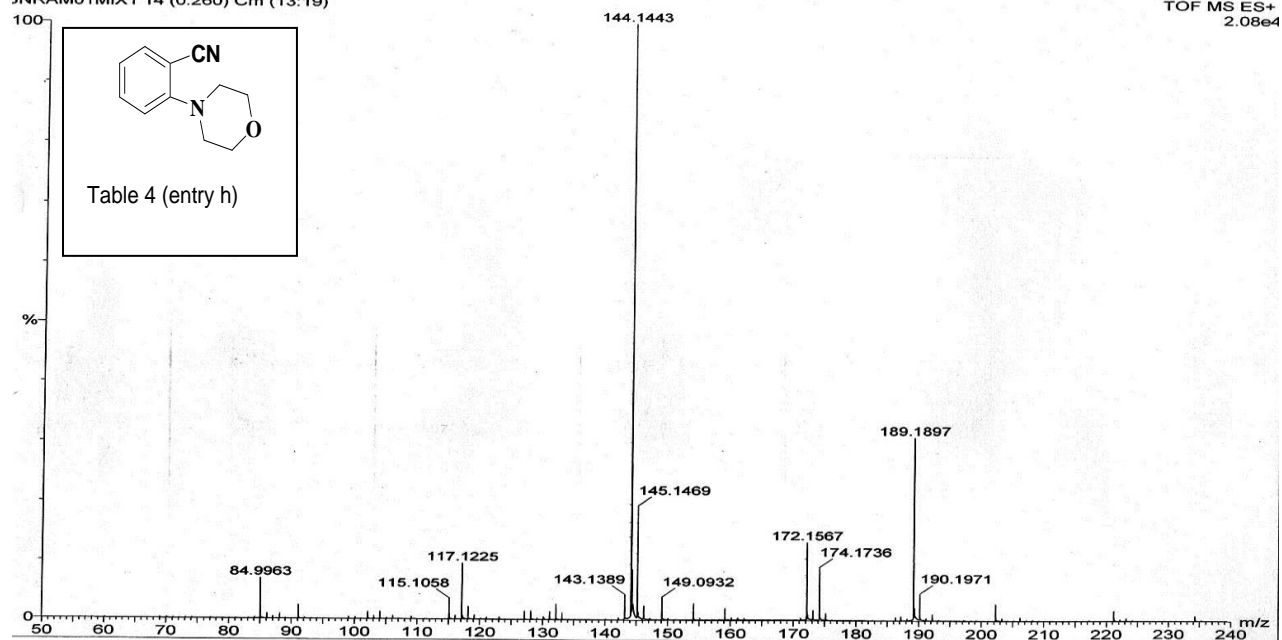

Table 4(entry i)

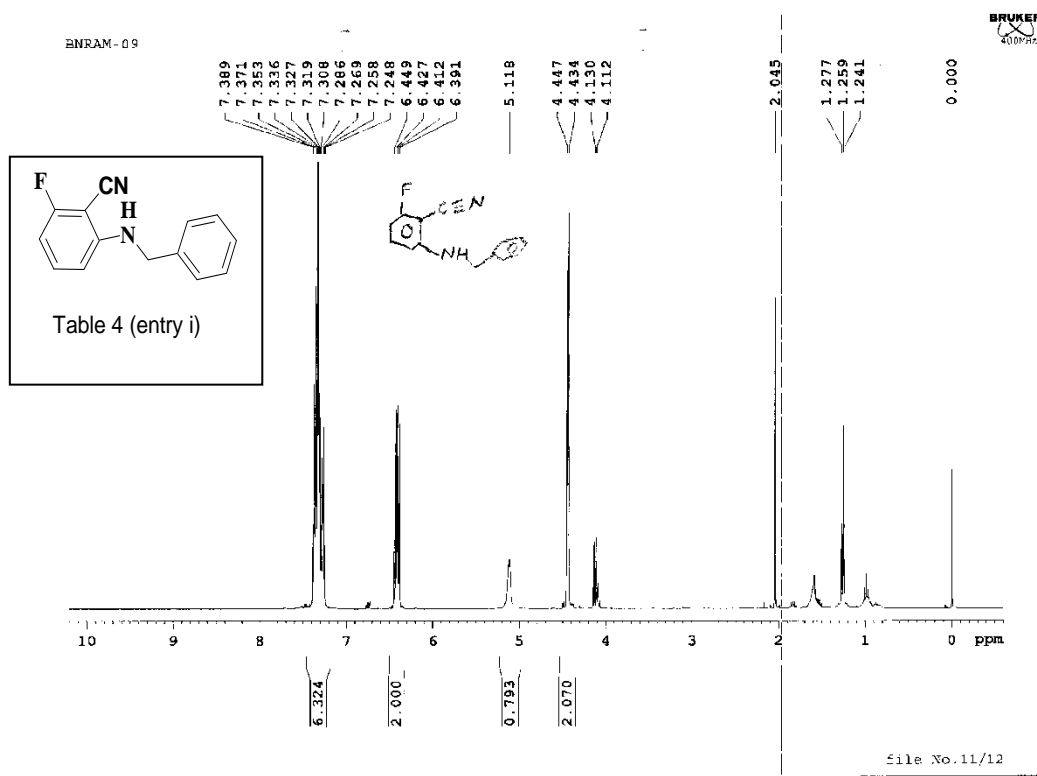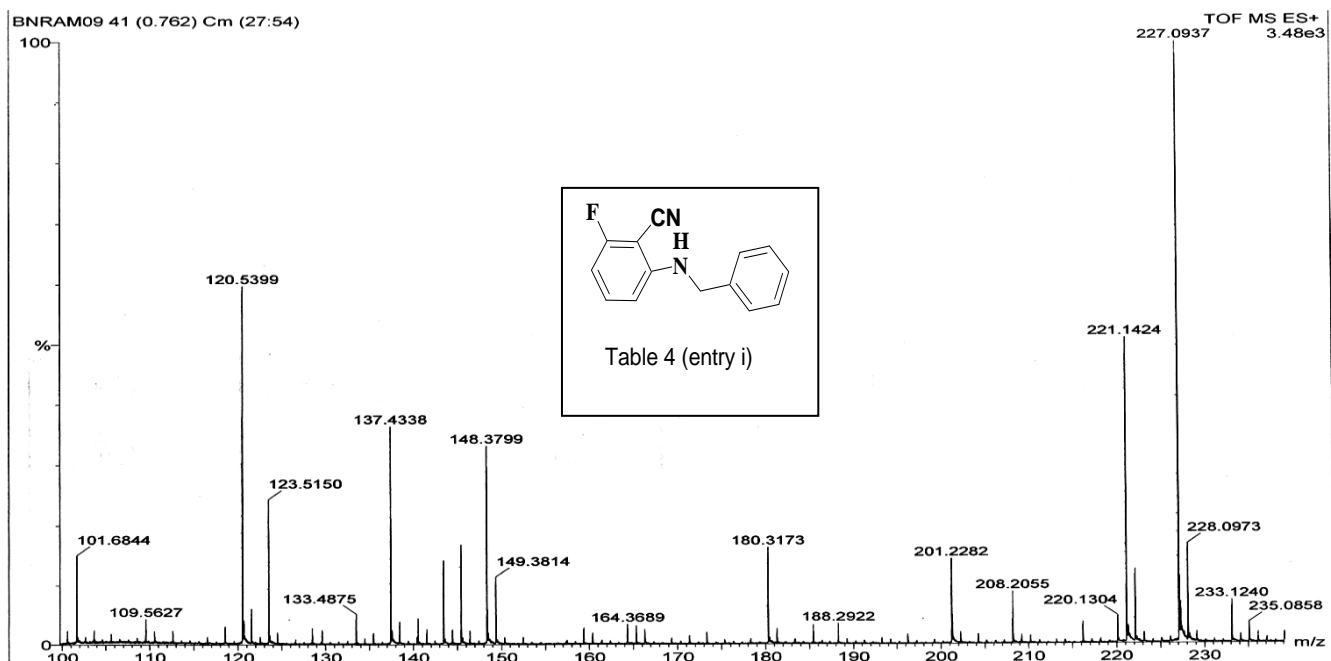

Table 4(entry i)

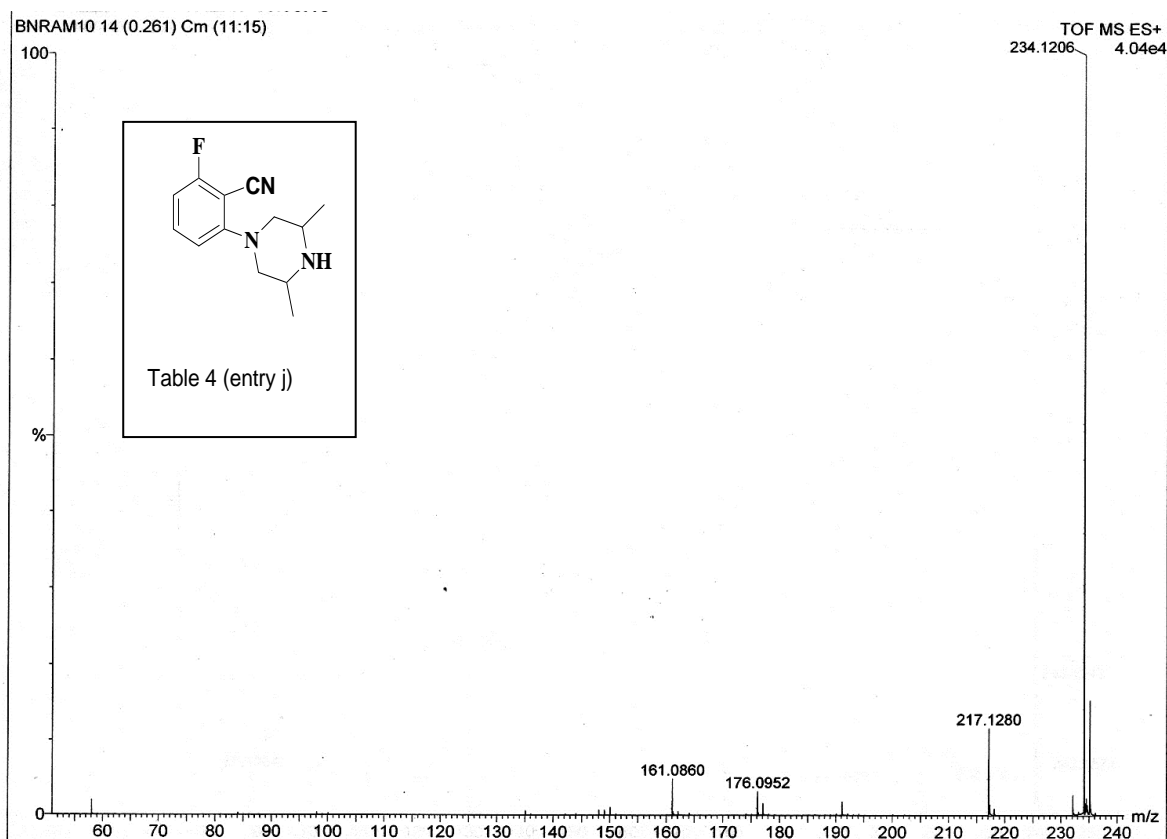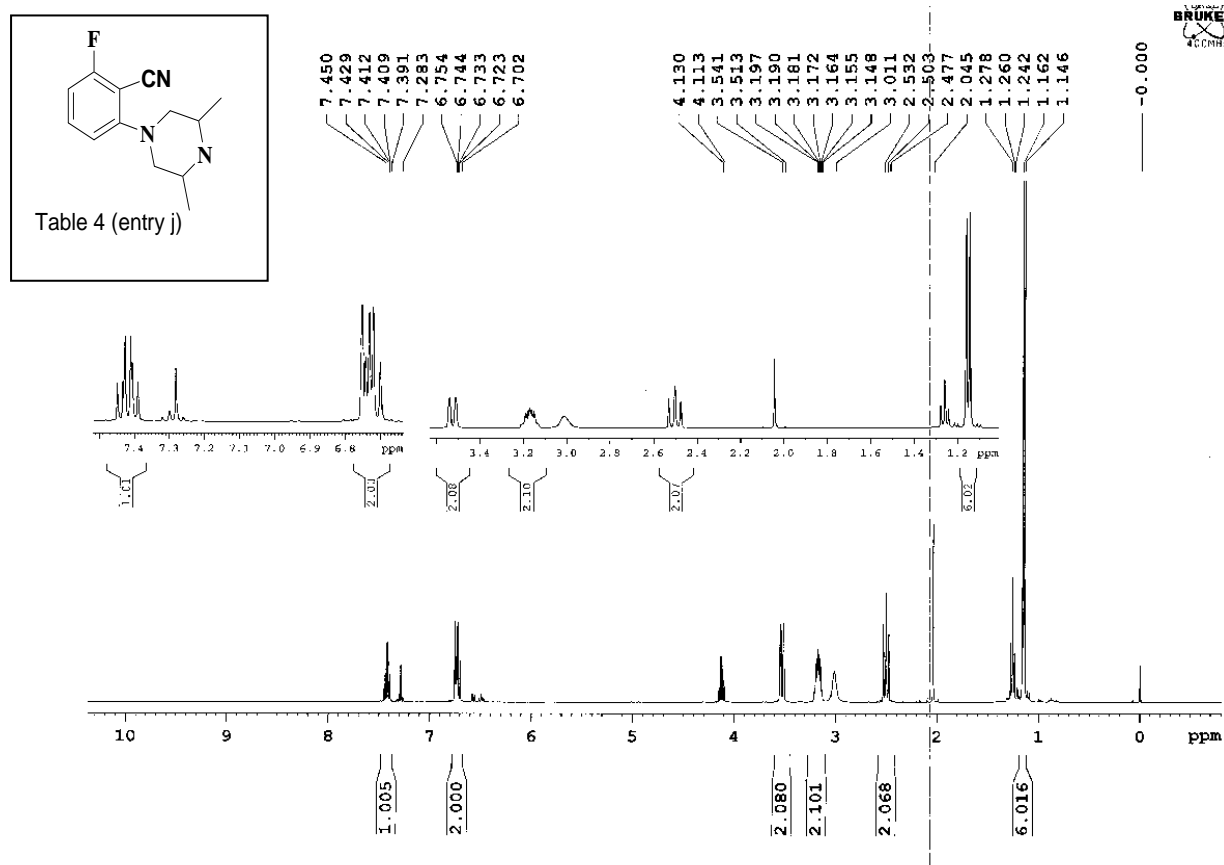

file No.11/83

### AM1 Calculation:

Structures, energies, and frequency calculations of 2-fluorobenzonitrile, piperidine, transition state 1 and 2, intermediate and product were calculated using semiempirical method AM1. Intermediate reaction coordinates (IRC) calculations were carried out in both forward and reverse directions. All the calculations were carried out by Gaussian 09.

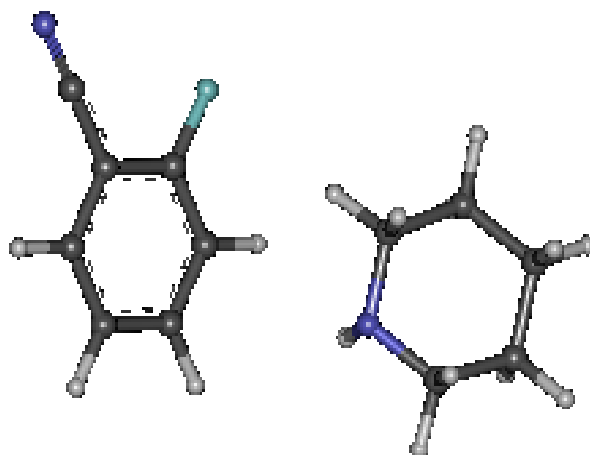

2-fluorobenzonitrile and piperidine: combined energy -12.75 Kcal/mol

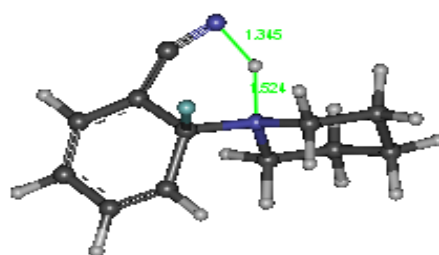

TS1 energy +88.38 Kcal/mol

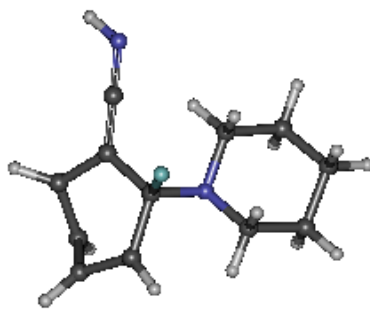

Intermediate energy +34.97 Kcal/mol

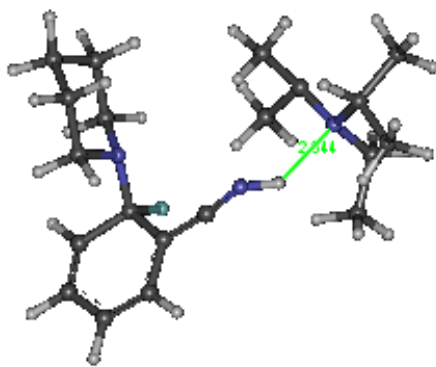

Intermediate + DIPEA , energy +10.28 Kcal/mol

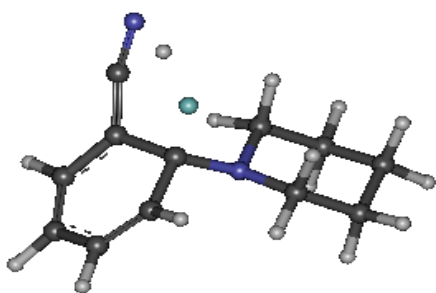

TS2 in absence of DIPEA, energy +106.48 Kcal/mol

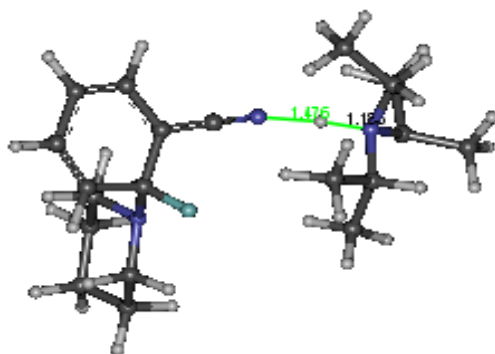

**TS2 in presence of DIPEA, energy +30.1 Kcal/mol**

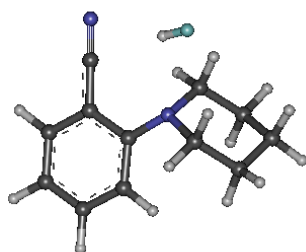

**Product in absence of DIPEA, -28.25 Kcal/mol**

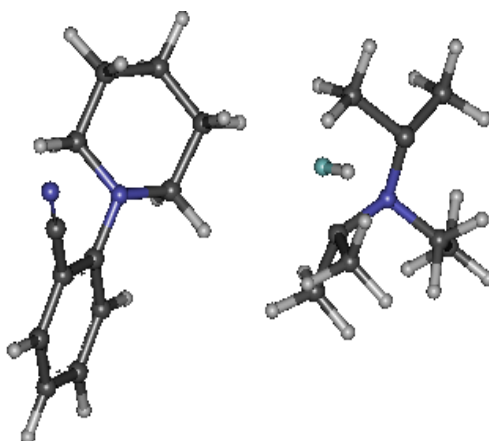

**Product in presence of DIPEA, -50.77 Kcal/mol**

**Table S1: Energy of various species**

|                        | <b>energy In presence of DIPEA</b> | <b>Relative energy In presence of DIPEA</b> | <b>energy In absence of DIPEA</b> | <b>Relative energy In absence of DIPEA</b> |
|------------------------|------------------------------------|---------------------------------------------|-----------------------------------|--------------------------------------------|
| <b>2-FB-PIP</b>        | -12.79                             | 37.98                                       | -12.79                            | 37.98                                      |
| <b>TS1</b>             | 88.38                              | 139.16                                      | 88.38                             | 139.16                                     |
| <b>IM1-DIPEA</b>       | 10.28                              | 61.06                                       | 34.97                             | 85.75                                      |
| <b>TS2</b>             | 30.1                               | 80.87                                       | 106.48                            | 157.26                                     |
| <b>Product complex</b> | -50.77                             | 0                                           | -28.25                            | 22.52                                      |
